# Supplementary material
Source: ML conference proceedings conference paper supplement (https://proceedings.neurips.cc/paper_files/paper/2018/hash/42299f06ee419aa5d9d07798b56779e2-Abstract.html)
Supplement: Supplementary file [file 42299f06ee419aa5d9d07798b56779e2-Supplemental.zip]

## A Block diagram of hierarchical character-level language model

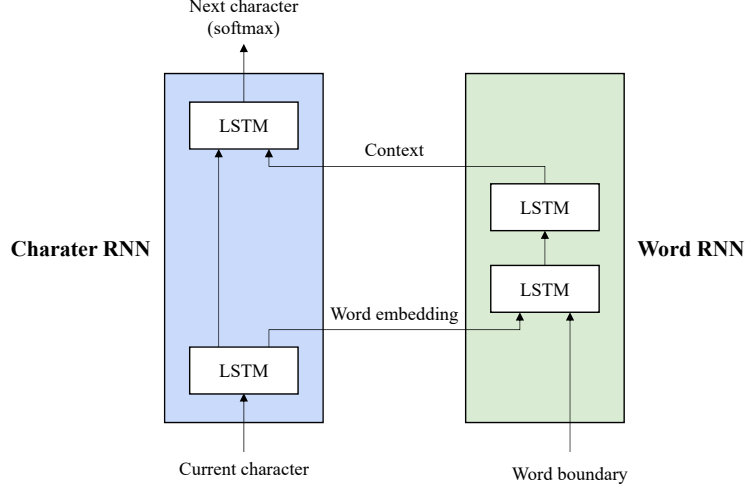

Figure 1: The architecture of the hierarchical recurrent neural network model used for language modeling.

## B Formulation of recurrent units

The recurrent units used in this work are described as follows:

LSTM:

$$\begin{aligned}
 \mathbf{f}_t &= \sigma(\mathbf{W}_f \mathbf{x}_t + \mathbf{U}_f \mathbf{h}_{t-1} + \mathbf{b}_f), \\
 \mathbf{i}_t &= \sigma(\mathbf{W}_i \mathbf{x}_t + \mathbf{U}_i \mathbf{h}_{t-1} + \mathbf{b}_i), \\
 \mathbf{o}_t &= \sigma(\mathbf{W}_o \mathbf{x}_t + \mathbf{U}_o \mathbf{h}_{t-1} + \mathbf{b}_o), \\
 \hat{\mathbf{c}}_t &= \tanh(\mathbf{W}_c \mathbf{x}_t + \mathbf{U}_c \mathbf{h}_{t-1} + \mathbf{b}_c), \\
 \mathbf{c}_t &= \mathbf{f}_t \odot \mathbf{c}_{t-1} + \mathbf{i}_t \odot \hat{\mathbf{c}}_t, \\
 \mathbf{h}_t &= \mathbf{o}_t \odot \tanh(\mathbf{c}_t).
 \end{aligned} \tag{1}$$

GRU:

$$\begin{aligned}
 \mathbf{z}_t &= \sigma(\mathbf{W}_z \mathbf{x}_t + \mathbf{U}_z \mathbf{h}_{t-1} + \mathbf{b}_z), \\
 \mathbf{r}_t &= \sigma(\mathbf{W}_r \mathbf{x}_t + \mathbf{U}_r \mathbf{h}_{t-1} + \mathbf{b}_r), \\
 \mathbf{h}_t &= (1 - \mathbf{z}_t) \odot \mathbf{h}_{t-1} + \mathbf{z}_t \odot \tanh(\mathbf{W}_h \mathbf{x}_t + \mathbf{U}_h (\mathbf{r}_t \odot \mathbf{h}_{t-1}) + \mathbf{b}_h).
 \end{aligned} \tag{2}$$

GILR-LSTM:

$$\begin{aligned}
 \mathbf{g}_t &= \sigma(\mathbf{V}_g \mathbf{x}_t + \mathbf{b}_g), \\
 \mathbf{j}_t &= \tanh(\mathbf{V}_j \mathbf{x}_t + \mathbf{b}_j), \\
 \tilde{\mathbf{h}}_t &= \mathbf{g}_t \odot \tilde{\mathbf{h}}_{t-1} + (1 - \mathbf{g}_t) \odot \mathbf{j}_t, \\
 [\mathbf{f}_t, \mathbf{i}_t, \mathbf{o}_t] &= \sigma\left([\mathbf{U}_f, \mathbf{U}_i, \mathbf{U}_o] \tilde{\mathbf{h}}_{t-1} + [\mathbf{V}_f, \mathbf{V}_i, \mathbf{V}_o] \mathbf{x}_t + [\mathbf{b}_f, \mathbf{b}_i, \mathbf{b}_o]\right), \\
 \mathbf{z}_t &= \tanh\left(\mathbf{U}_z \tilde{\mathbf{h}}_{t-1} + \mathbf{V}_z \mathbf{x}_t + \mathbf{b}_z\right), \\
 \mathbf{c}_t &= \mathbf{f}_t \odot \mathbf{c}_{t-1} + \mathbf{i}_t \odot \mathbf{z}_t, \\
 \mathbf{h}_t &= \mathbf{o}_t \odot \mathbf{c}_t.
 \end{aligned} \tag{3}$$

## C Decoding algorithm

**Input:** AM output probability matrix  $P_{\text{CTC}} \in \mathbb{R}^{|\Sigma| \times T}$ , beam width  $B$ , number of search candidates  $k$ , language model weight  $\alpha$ , insertion bonus  $\gamma$ , vocabulary  $\Sigma$

```

1  $\mathbf{A}_{prev} = \{\phi\}$ 
2  $P_{\text{CTC}}(\text{blank}|\mathbf{x}_{1:0}) = 1$ 
3 for  $t = 1$  to  $T$  do
4   if  $P_{\text{CTC}}(\text{blank}|\mathbf{x}_{1:t-1}) > 0.95$  and  $P_{\text{CTC}}(\text{blank}|\mathbf{x}_{1:t}) > 0.95$  then
5     continue
6   end
7    $\mathbf{A}_{next} = \{\}$ 
8    $\mathbf{K} = \text{top-}k \text{ labels in } \Sigma \text{ according to value of } P_{\text{CTC}}(\mathbf{c}|\mathbf{x}_{1:t})$ 
9   for  $l$  in  $\mathbf{A}_{prev}$  do
10    for  $c$  in  $\mathbf{K}$  do
11      if  $c = \text{blank}$  then
12         $p_{nb}(l) = p_{nb}(l)P_{\text{CTC}}(\text{blank}|\mathbf{x}_{1:t})$ 
13         $p_b(l) = (p_{nb}(l) + p_b(l))P_{\text{CTC}}(\text{blank}|\mathbf{x}_{1:t})$ 
14      else
15         $l^+ = \text{concat}(l, c)$ 
16        if  $c = l_{end}$  then
17           $p_{nb}(l^+) = p_b(l)P_{\text{CTC}}(c|\mathbf{x}_{1:t})\gamma P_{LM}(c|l)^\alpha$ 
18           $p_{nb}(l) = p_b(l)P_{\text{CTC}}(c|\mathbf{x}_{1:t})$ 
19        else
20           $p_{nb}(l^+) = (p_b(l) + p_{nb}(l))P_{\text{CTC}}(c|\mathbf{x}_{1:t})\gamma P_{LM}(c|l)^\alpha$ 
21        end
22      end
23      add  $l^+$  to  $\mathbf{A}_{next}$ 
24    end
25  end
26  assign top- $B$  of  $\mathbf{A}_{next}$  to  $\mathbf{A}_{prev}$ 
27 end

```

**Algorithm 1:** Prefix beam search in proposed system.

The most time-consuming part in the decoding is computing the probability of  $P_{LM}(c|l)$ , which is required in the line 17 and 20. Time complexity of the LM computation is  $O(B \times T \times |\Sigma|)$ , but the actual computation complexity can be reduced to  $O(B \times |l| \times |\Sigma|)$  by reusing the result of LM for same inputs. Skipping consecutive blanks and candidate pruning are applied in line number 5 and 8, respectively. Table 1 shows the ratio of skipped repeated blank frames. The number of operations of LM per frame according to the number of candidates are shown in Table 2.

Table 1: The ratio of frames whose decoding stages are skipped due to high CTC blank output.

| Acoustic model     | Downsampling ratio | Percentage of skipping |
|--------------------|--------------------|------------------------|
| WSJ - Character    | $\times 2$         | 33.8%                  |
| WSJ - Word piece   | $\times 4$         | 44.33%                 |
| Libri - Word piece | $\times 8$         | 20.23%                 |

Table 2: The number of LM operations with the varying number of candidates.

| Number of candidates  | 20    | 30    | 40    | 100   |
|-----------------------|-------|-------|-------|-------|
| LM operations / frame | 4.365 | 4.488 | 4.593 | 4.820 |

## D Training curves of the acoustic models

We compared the train and valid loss curves of some selected models. The peaks in training curves are due to curriculum-like learning scheduling. SRU without 1-D convolution was not trained well. LSTM was converged faster than other models but it reached local minimum quickly. Training loss of i-SRU was reduced faster than SRU, while they showed the similar valid loss in the end of training.

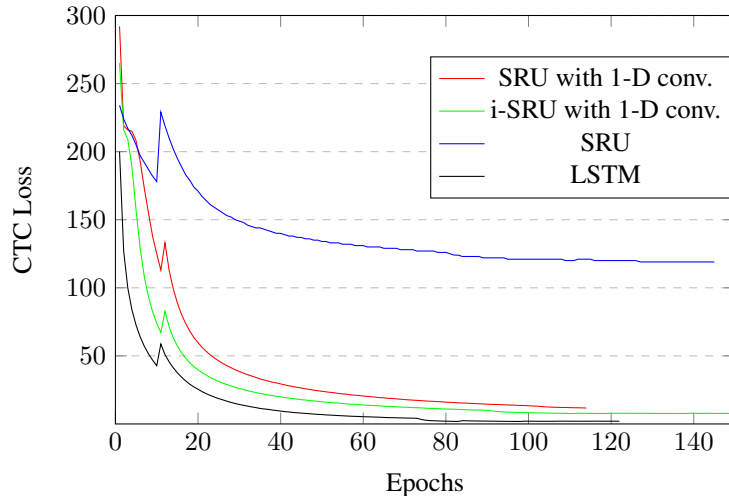

Figure 2: Training loss of acoustic models when trained on WSJ SI-284.

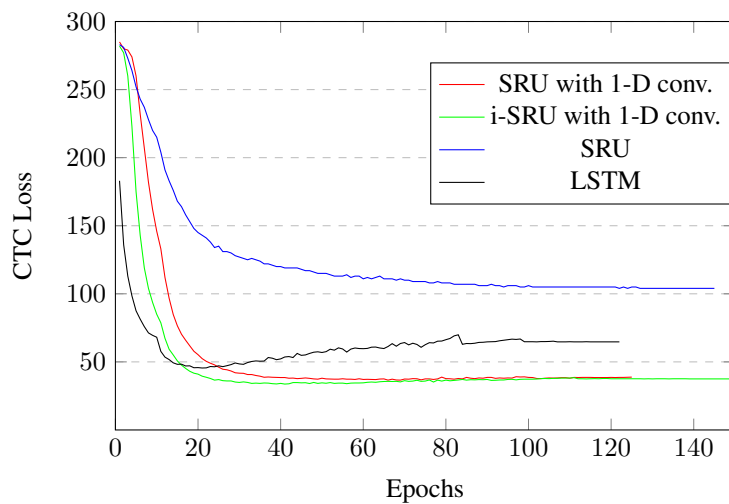

Figure 3: Validation loss of acoustic models when trained on WSJ SI-284

## E Example results of word piece and character level speech recognition

Table 3: Examples which are correct in wordpiece-level model but wrong in character-level model.

|                        |                                                                                                              |
|------------------------|--------------------------------------------------------------------------------------------------------------|
| Label                  | THE PINK SHEET A DRUG INDUSTRY TRADE LETTER REPORTED                                                         |
| char-greedy<br>char-LM | THE PANKSHET A DRUG INDUSTRY TRADE LETTER REPORTED<br>THE BANK HIT A DRUG INDUSTRY TRADE LETTER REPORTED     |
| wp-greedy<br>wp-LM     | THE PINK SHEET A DRUG INDUSTRY TRADE LETTER REPORTED<br>THE PINK SHEET A DRUG INDUSTRY TRADE LETTER REPORTED |
| Label                  | THIS WEEK LOCAL GOVERNMENTS HAVE APPEARED IN THE...                                                          |
| char-greedy<br>char-LM | THIS WEEK LOCAL GOVERNMENTS HAVE THE PEAR IN THE...<br>THIS WEEK LOCAL GOVERNMENTS HAVE THE PART IN THE...   |
| wp-greedy<br>wp-LM     | THIS WEEK LOCAL GOVERNMENTS HAVE APPEARED IN THE...<br>THIS WEEK LOCAL GOVERNMENTS HAVE APPEARED IN THE...   |

Table 4: Examples that are correct in character-level model but wrong in word piece-level model.

|                        |                                                                               |
|------------------------|-------------------------------------------------------------------------------|
| Label                  | SO MR. WANG TELLS PEOPLE HE IS FIFTY                                          |
| char-greedy<br>char-LM | SO MR. WEANGTELL'S PEOPLE HE IS FIFTY<br>SO MR. WANG TELLS PEOPLE HE IS FIFTY |
| wp-greedy<br>wp-LM     | SO MR. WGTELLES PEOPLE HE IS FIFTY<br>SO MR. WANGTELL'S PEOPLE HE IS FIFTY    |
| Label                  | THE MARKETS TEND TO MAGNIFY THE NEWS                                          |
| char-greedy<br>char-LM | THE MARKETS TEND DOMAGNIFY THE NEWS<br>THE MARKETS TEND TO MAGNIFY THE NEWS   |
| wp-greedy<br>wp-LM     | THE MARKET'S TEND TO MAGNIFY THE NEWS<br>THE MARKET'S TEND TO MAGNIFY THE NEW |

## F Example of results that are corrected when HCLM is used

Table 5: Example sentences that are corrected when HCLM is used.

|                            |                                                                                                                                                                                                          |
|----------------------------|----------------------------------------------------------------------------------------------------------------------------------------------------------------------------------------------------------|
| Label                      | RESPONSES TEND TO BE MUTE                                                                                                                                                                                |
| greedy<br>LSTM-CLM<br>HCLM | RESPONSEES TEND TO BE MUNED<br>RESPONSE IS TEND TO BE MUTED<br>RESPONSES TEND TO BE MUTED                                                                                                                |
| Label                      | I'M NOT AT ALL UNHAPPY WITH WHAT I'M SEEING                                                                                                                                                              |
| greedy<br>LSTM-CLM<br>HCLM | I'M NOT IT ALL AND HAPPY WITH WHAT I'M SEE<br>I'M NOT AT ALL AND HAPPY WITH WHAT I'M SEEN<br>I'M NOT AT ALL UNHAPPY WITH WHAT I'M SEEING                                                                 |
| Label                      | THE BIG SHOE IS GOING TO DROP WHEN WE SEE THE TRADE NUMBER                                                                                                                                               |
| greedy<br>LSTM-CLM<br>HCLM | THE BIG SHE WAS GOING TO DROP INLY SEE THE TRADE NUMBER<br>THE BIG SHE WAS GOING TO DROP IN WE SEE THE TRADE NUMBER<br>THE BIG SHOE IS GOING TO DROP WHEN WE SEE THE TRADE NUMBER                        |
| Label                      | AND THEY BALK AT THE APPROACH USED IN MEAT AND POULTRY PLANTS...                                                                                                                                         |
| greedy<br>LSTM-CLM<br>HCLM | AND THEY BALCK AT THE APPROACH USED IN MEET AND PULTRY PLANTS...<br>AND THEY BALK AT THE APPROACH USED IN MEET AND POULTRY PLANTS...<br>AND THEY BALK AT THE APPROACH USED IN MEAT AND POULTRY PLANTS... |
